# Supplementary material for: Identification of Novel Genes That Modify Phenotypes Induced by Alzheimer's β-Amyloid Overexpression in Drosophila
Source: Oxford University Press journal article supplement (doi:10.1534/genetics.107.078394), 2008-02-04
Supplement: genetics.107.078394-1.doc [file genetics.107.078394-1.doc]

DATA SUPPLEMENT

**Genotypes of flies used in this work**

Human *Ab42*-expressing strains:

1. *w1118/w1118 ; eyGal4, GMRAb42KJ54.2/CyO ; GMRAb42KJ54.3/MKRS*

2. *elavGal4C155/elavGal4C155 ; UASAb42H29.3/CyO,tubGal80 ; tubGal80ts/tub-Gal80ts*

Human *huntingtin-exon 1* expressing strain

*+/+ ; GMR-Gal4/CyO,tubGal80 ; UAS-Httex1Q93/Tb*

Human *tau*-expressing strain

+/+ ; ey-Gal4/CyO ; UAS-tau/MKRS

**Effect of modifiers on lifespan:** In order to examine if tissue-specificity played a role in modifying Ab-associated toxicity, we tested the effect of modifiers in a tissue other than the eye. For this, we used flies expressing Ab42 in all CNS neurons. Since we have previously shown that pan-neuronal expression of Ab42 causes a short lifespan phenotype attributed to brain degeneration (FINELLI *et al*. 2004; IIJIMA *et al*. 2004), we examined the ability of the 23 EP eye phenotype-modifiers to affect the lifespan of Ab42-expressing flies (Table 1). Fig. 1S shows the results of this analysis for 20 modifiers. Three additional modifiers caused lethality when co-expressed with Ab42 and a pan-neuronal driver.

Twelve mutations modified the lifespan phenotype in the same way that they modified the rough eye phenotype, indicating a common function of these genes in the two different cell types. The gene *mub*, a putative regulator of translation, *Toll*, mediating immune responses, the peptidases *svr* and *nep2* and the transcriptional regulators *Dsp1* and *Stich* all seem to have cell type-independent effects. The remaining mutations in this group are either not mapped [*EP(X)1504, EP(2)0330, EP(3)3041*], or may be affecting the function of two genes [*EP(3)595b, EP(3)3099*], complicating the analysis of their effects.

Three additional modifiers of the eye phenotype [*gEP(X)0514*, *EP(2)0386* and *SnfgEP(3)3015b*] had no effect on the lifespan phenotype. Lack of modification of the lifespan phenotype suggests that the affected genes might be expressed at low levels or not at all in the majority of CNS neurons and cannot interact with Ab in these cells. The absence of modification of the lifespan phenotype might indicate that a stronger allele might be needed, in order to cause a detectable effect.

For the modifiers *EP(X)1318*, *EP(2)0684* and *EP(2)2510CG7231*, it was not possible to recover experimental progeny carrying all three transgenes [*elavGal4, A*b*42, EP*], indicating that the EP insertion caused lethality in the presence of Ab. Interestingly, in two of these cases [*EP(2)0684*, and *CG7231EP(2)2510*], the mutation caused an enhancement of the eye phenotype suggesting that lethality might be a consequence of excessive enhancement of the short lifespan phenotype. Such an effect would characterize these mutants as enhancers of the lifespan phenotype, thus causing the same type of modification as in the eye phenotype.

The remaining five modifiers [*EP(X)0308*, *CG2924EP(X)1596, EP(3)3348, EP(3)3405* and *EP(3)3603*] are causing opposite effects in the eye versus the lifespan phenotype. In three of these cases [*EP(X)0308*, *EP(3)3348* and *EP(3)3405*], the EP insertion may be affecting two genes, thus complicating the analysis of their effects in a different tissue. In order to resolve these cases, additional mutations in the candidate genes would have to be tested for effects on lifespan. The mutation *EP(X)1596* affects a ubiquitin conjugating enzyme. It is possible that in this case, the gene has a pleiotropic function, or it has a different role or substrate in different cellular subtypes. Another modifier in this category, [*EP(3)3405*], affects a gene of unknown function.

We have observed that the EP insertion strains without Gal4 have normal viability and at least in one case [*EP(3)3348*] the insertion is not lethal in the presence of elavGal4 (Finelli et al, 2004; supplemental material). However, we cannot exclude the possibility that some of the EP insertions cause lethality in the absence of Ab. Although only the *nep2EP(3)3596*mutation causes suppression of lethality and all the other modifiers that induce an effect are enhancers, we suggest that this is a random observation since we have identified several suppressors in other screens that we have carried out (Song et al, unpublished).

**FIGURE 1S**. Lifespan of transgenic Drosophila co-expressing Ab42 and either UAS-GFP as a control (red squares) or a modifier mutation. The co-expression of UAS-GFP does not alter the compromised lifespan of Ab42-expressing flies (not shown). All UAS-carrying transgenes are induced by the *elavGal4C155* driver. Genotypes of mutants that were tested are shown below each graph. (A-B) mutations causing shortening of the lifespan of Ab42-expressing flies. (C) mutations that do not cause significant change or suppress the lifespan phenotype of Ab42-expressing flies.

**FIGURE 1S**

A

B

# of flies

# of flies

# of flies

C

Days

Days

Days

**FIGURE 2S.** Levels of Ab42 RNA, measured by real-time PCR, in control flies (Abeta only) and in flies co-expressing mutations in genes encoding transcriptional regulatory function. Two different experiments were performed for *EP(X)0355* and *EP(2)0684* in (A ) and *elB9*, *EP(2)0386* and *EP(3)3470* in (B). The mutations *EP(2)0684*, *elB9* and *EP(2)0386* do not affect levels of Ab42 RNA.

**FIGURE 2S**

A

B
